CORRECTION

# Correction: Effects of a low-carbohydrate diet in adults with type 1 diabetes management: A single arm non-randomised clinical trial

Jessica L. Turton, Grant D. Brinkworth, Helen M. Parker, David Lim, Kevin Lee, Amy Rush, Rebecca Johnson, Kieron B. Rooney

The word “management” should be removed in the article title. The correct title is: Effects of a low-carbohydrate diet in adults with type 1 diabetes: A single arm non-randomised clinical trial. The correct citation is: Turton JL, Brinkworth GD, Parker HM, Lim D, Lee K, Rush A, et al. (2023) Effects of a low-carbohydrate diet in adults with type 1 diabetes: A single arm non-randomised clinical trial. PLoS ONE 18(7): e0288440. <https://doi.org/10.1371/journal.pone.0288440>

## Reference

1. Turton JL, Brinkworth GD, Parker HM, Lim D, Lee K, Rush A, et al. Effects of a low-carbohydrate diet in adults with type 1 diabetes management: A single arm non-randomised clinical trial. PLoS One. 2023;18(7):e0288440. <https://doi.org/10.1371/journal.pone.0288440> PMID: [37432920](https://pubmed.ncbi.nlm.nih.gov/37432920/)

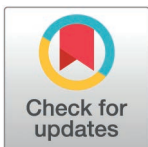

## OPEN ACCESS

**Citation:** Turton JL, Brinkworth GD, Parker HM, Lim D, Lee K, Rush A, et al. (2025) Correction: Effects of a low-carbohydrate diet in adults with type 1 diabetes management: A single arm non-randomised clinical trial. PLoS One 20(8): e0329632. <https://doi.org/10.1371/journal.pone.0329632>

**Published:** August 1, 2025

**Copyright:** © 2025 Turton et al. This is an open access article distributed under the terms of the [Creative Commons Attribution License](https://creativecommons.org/licenses/by/4.0/), which permits unrestricted use, distribution, and reproduction in any medium, provided the original author and source are credited.
